# Supplementary material for: How Methodologic Differences Affect Results of Economic Analyses: A Systematic Review of Interferon Gamma Release Assays for the Diagnosis of LTBI
Source: PLoS One. 2013 Mar 7;8(3):e56044. doi: 10.1371/journal.pone.0056044 (PMC3591384; doi:10.1371/journal.pone.0056044)
Supplement: Figure S3 — Drummond 35 Item Quality Checklist. (DOC) [file pone.0056044.s003.doc]

Figure S3: Drummond 35 Item Quality Checklist (Reference (7))

| **Item** | | **Yes** | **No** | **Not clear** | **Not appropriate** |
| --- | --- | --- | --- | --- | --- |
| **Study design** | |  |  |  |  |
| 1. | The research question is stated. |  |  |  |  |
| 2. | The economic importance of the research question is stated. |  |  |  |  |
| 3. | The viewpoint(s) of the analysis are clearly stated and justified. |  |  |  |  |
| 4. | The rationale for choosing alternative programmes or interventions compared is stated. |  |  |  |  |
| 5. | The alternatives being compared are clearly described. |  |  |  |  |
| 6. | The form of economic evaluation used is stated. |  |  |  |  |
| 7. | The choice of form of economic evaluation is justified in relation to the questions addressed. |  |  |  |  |
| **Data collection** | |  |  |  |  |
| 8. | The source(s) of effectiveness estimates used are stated. |  |  |  |  |
| 9. | Details of the design and results of effectiveness study are given (if based on a single study). |  |  |  |  |
| 10. | Details of the methods of synthesis or meta-analysis of estimates are given (if based on a synthesis of a number of effectiveness studies). |  |  |  |  |
| 11. | The primary outcome measure(s) for the economic evaluation are clearly stated. |  |  |  |  |
| 12. | Methods to value benefits are stated. |  |  |  |  |
| 13. | Details of the subjects from whom valuations were obtained were given. |  |  |  |  |
| 14. | Productivity changes (if included) are reported separately. |  |  |  |  |
| 15. | The relevance of productivity changes to the study question is discussed. |  |  |  |  |
| 16. | Quantities of resource use are reported separately from their unit costs. |  |  |  |  |
| 17. | Methods for the estimation of quantities and unit costs are described. |  |  |  |  |
| 18. | Currency and price data are recorded. |  |  |  |  |
| 19. | Details of currency of price adjustments for inflation or currency conversion are given. |  |  |  |  |
| 20. | Details of any model used are given. |  |  |  |  |
| 21. | The choice of model used and the key parameters on which it is based are justified. |  |  |  |  |
| **Analysis and interpretation of results** | |  |  |  |  |
| 22. | Time horizon of costs and benefits is stated. |  |  |  |  |
| 23. | The discount rate(s) is stated. |  |  |  |  |
| 24. | The choice of discount rate(s) is justified. |  |  |  |  |
| 25. | An explanation is given if costs and benefits are not discounted. |  |  |  |  |
| 26. | Details of statistical tests and confidence intervals are given for stochastic data. |  |  |  |  |
| 27. | The approach to sensitivity analysis is given. |  |  |  |  |
| 28. | The choice of variables for sensitivity analysis is justified. |  |  |  |  |
| 29. | The ranges over which the variables are varied are justified. |  |  |  |  |
| 30. | Relevant alternatives are compared. |  |  |  |  |
| 31. | Incremental analysis is reported. |  |  |  |  |
| 32. | Major outcomes are presented in a disaggregated as well as aggregated form. |  |  |  |  |
| 33. | The answer to the study question is given. |  |  |  |  |
| 34. | Conclusions follow from the data reported. |  |  |  |  |
| 35. | Conclusions are accompanied by the appropriate caveats. |  |  |  |  |
